# Supplementary material
Source: Springer Nature journal article supplement (https://www.springermedizin.de/resource/supplementary/13256_2013_2648_MOESM1_ESM.pdf/9650192)

**A**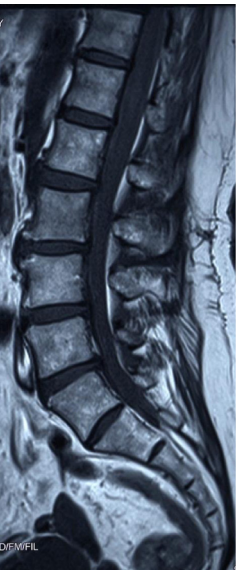**B**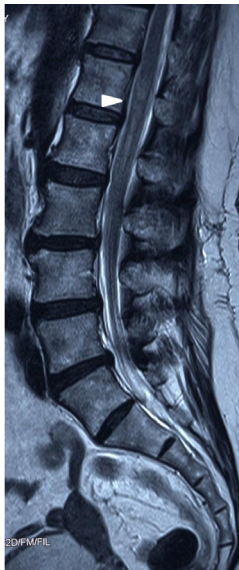**C**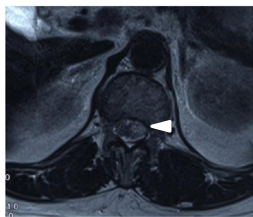

Supplement: MOESM1 [file 9650192]
